# Supplementary material for: Intramolecular tetrazine-acryloyl cycloaddition: chemistry and applications
Source: Royal Society of Chemistry journal article supplement (doi:10.1039/d2sc04331a), 2022-01-01
Supplement: d2sc04331a1.pdf [file d2sc04331a1.pdf]

### Supporting Information (X-ray data)

**X-ray Crystallography:** Crystals of **4f** were removed from the mother liquor and transferred to a glass slide covered in Paraton™ oil where it was evaluated and mounted with the assistance of an optical microscope. X-ray reflection intensity data were collected on a Bruker D8 Quest with a Photon II CPAD detector employing graphite-monochromated Mo-K $\alpha$  radiation ( $\lambda = 0.71073 \text{ \AA}$ ) at a temperature of 173(1) K. Rotation frames were integrated using SAINT,<sup>1</sup> producing a listing of unaveraged  $F^2$  and  $\sigma(F^2)$  values which were then passed to the SHELXT<sup>2</sup> program package for further processing and structure solution. The intensity data were corrected for Lorentz and polarization effects and for absorption using SADABS.<sup>3</sup> The structures were solved by direct methods (SHELXT).<sup>2</sup> Refinement was by full-matrix least squares based on  $F^2$  using SHELXL.<sup>4</sup> All reflections were used during refinements. Non-hydrogen atoms were refined anisotropically and hydrogen atoms were refined using a riding model.

**Table S1.** Crystal data and structure refinement for **4f**.

|                                             |                                                                  |
|---------------------------------------------|------------------------------------------------------------------|
| Identification code                         | MX20220725_0m                                                    |
| Empirical formula                           | C <sub>32</sub> H <sub>22</sub> N <sub>6</sub> O <sub>4</sub>    |
| Formula weight                              | 554.55                                                           |
| Temperature/K                               | 173.0                                                            |
| Crystal system                              | monoclinic                                                       |
| Space group                                 | P2 <sub>1</sub> /c                                               |
| a/Å                                         | 11.0961(4)                                                       |
| b/Å                                         | 9.9627(3)                                                        |
| c/Å                                         | 22.3275(6)                                                       |
| $\alpha$ /°                                 | 90                                                               |
| $\beta$ /°                                  | 94.4300(10)                                                      |
| $\gamma$ /°                                 | 90                                                               |
| Volume/Å <sup>3</sup>                       | 2460.87(13)                                                      |
| Z                                           | 4                                                                |
| $\rho_{\text{calc}}/\text{cm}^3$            | 1.497                                                            |
| $\mu/\text{mm}^{-1}$                        | 0.102                                                            |
| F(000)                                      | 1152.0                                                           |
| Crystal size/mm <sup>3</sup>                | 0.16 × 0.16 × 0.06                                               |
| Radiation                                   | MoK $\alpha$ ( $\lambda = 0.71073$ )                             |
| 2 $\Theta$ range for data collection/°      | 4.48 to 55.104                                                   |
| Index ranges                                | -14 ≤ h ≤ 14, -12 ≤ k ≤ 12, -29 ≤ l ≤ 28                         |
| Reflections collected                       | 62503                                                            |
| Independent reflections                     | 5678 [ $R_{\text{int}} = 0.0327$ , $R_{\text{sigma}} = 0.0150$ ] |
| Data/restraints/parameters                  | 5678/0/379                                                       |
| Goodness-of-fit on $F^2$                    | 1.031                                                            |
| Final R indexes [ $I \geq 2\sigma(I)$ ]     | $R_1 = 0.0387$ , $wR_2 = 0.0984$                                 |
| Final R indexes [all data]                  | $R_1 = 0.0446$ , $wR_2 = 0.1027$                                 |
| Largest diff. peak/hole / e Å <sup>-3</sup> | 0.39/-0.43                                                       |
| CCDC Deposit #                              | 2193153                                                          |

**Table S2.** Bond distances for **4f**.

| Atom | Atom | Length (Å) | Atom | Atom | Length (Å) |
|------|------|------------|------|------|------------|
| O1   | C1   | 1.2192(15) | O3   | C17  | 1.2160(15) |
| O2   | C1   | 1.3764(14) | O4   | C17  | 1.3833(15) |
| O2   | C9   | 1.3713(14) | O4   | C25  | 1.3733(14) |
| N1   | N2   | 1.3828(14) | N4   | N5   | 1.3750(14) |
| N1   | C3   | 1.3647(16) | N4   | C19  | 1.3614(15) |
| N2   | C11  | 1.2868(16) | N5   | C27  | 1.2873(16) |
| N3   | C12  | 1.3437(16) | N6   | C28  | 1.3381(16) |
| N3   | C16  | 1.3438(16) | N6   | C32  | 1.3358(16) |
| C1   | C2   | 1.4295(17) | C17  | C18  | 1.4304(16) |
| C2   | C3   | 1.3643(16) | C18  | C19  | 1.3656(16) |
| C2   | C10  | 1.4983(16) | C18  | C26  | 1.5003(16) |
| C3   | C4   | 1.4534(16) | C19  | C20  | 1.4528(16) |
| C4   | C5   | 1.4061(17) | C20  | C21  | 1.4054(17) |
| C4   | C9   | 1.3970(17) | C20  | C25  | 1.3950(16) |
| C5   | C6   | 1.3832(18) | C21  | C22  | 1.3818(17) |
| C6   | C7   | 1.393(2)   | C22  | C23  | 1.3925(18) |
| C7   | C8   | 1.3840(19) | C23  | C24  | 1.3813(18) |
| C8   | C9   | 1.3908(17) | C24  | C25  | 1.3880(17) |
| C10  | C11  | 1.5070(16) | C26  | C27  | 1.5098(16) |
| C11  | C12  | 1.4840(16) | C27  | C28  | 1.4785(16) |
| C12  | C13  | 1.3982(17) | C28  | C29  | 1.3962(17) |
| C13  | C14  | 1.3848(18) | C29  | C30  | 1.3824(18) |
| C14  | C15  | 1.388(2)   | C30  | C31  | 1.3821(19) |
| C15  | C16  | 1.3825(19) | C31  | C32  | 1.3814(19) |

**Table S3.** Bond angles for **4f**.

| Atom | Atom | Atom | Angle (°)  | Atom | Atom | Atom | Angle (°)  |
|------|------|------|------------|------|------|------|------------|
| C9   | O2   | C1   | 121.19(9)  | C25  | O4   | C17  | 121.27(9)  |
| C3   | N1   | N2   | 122.57(10) | C19  | N4   | N5   | 123.64(10) |
| C11  | N2   | N1   | 118.03(10) | C27  | N5   | N4   | 118.26(10) |
| C16  | N3   | C12  | 117.69(11) | C32  | N6   | C28  | 117.15(11) |
| O1   | C1   | O2   | 116.31(11) | O3   | C17  | O4   | 116.29(11) |
| O1   | C1   | C2   | 125.28(11) | O3   | C17  | C18  | 125.61(11) |
| O2   | C1   | C2   | 118.41(10) | O4   | C17  | C18  | 118.10(10) |
| C1   | C2   | C10  | 118.13(10) | C17  | C18  | C26  | 117.52(10) |
| C3   | C2   | C1   | 121.23(11) | C19  | C18  | C17  | 121.25(11) |
| C3   | C2   | C10  | 120.63(11) | C19  | C18  | C26  | 121.19(10) |
| N1   | C3   | C4   | 120.09(10) | N4   | C19  | C18  | 120.38(11) |
| C2   | C3   | N1   | 120.00(11) | N4   | C19  | C20  | 119.57(10) |
| C2   | C3   | C4   | 119.90(11) | C18  | C19  | C20  | 120.05(10) |
| C5   | C4   | C3   | 124.82(11) | C21  | C20  | C19  | 124.81(11) |
| C9   | C4   | C3   | 116.97(11) | C25  | C20  | C19  | 117.06(11) |
| C9   | C4   | C5   | 118.20(11) | C25  | C20  | C21  | 118.10(11) |

| Atom | Atom | Atom | Angle (°)  | Atom | Atom | Atom | Angle (°)  |
|------|------|------|------------|------|------|------|------------|
| C6   | C5   | C4   | 120.48(12) | C22  | C21  | C20  | 120.53(11) |
| C5   | C6   | C7   | 119.98(12) | C21  | C22  | C23  | 120.04(12) |
| C8   | C7   | C6   | 120.77(12) | C24  | C23  | C22  | 120.53(11) |
| C7   | C8   | C9   | 118.87(12) | C23  | C24  | C25  | 119.14(11) |
| O2   | C9   | C4   | 122.29(11) | O4   | C25  | C20  | 122.19(11) |
| O2   | C9   | C8   | 116.03(11) | O4   | C25  | C24  | 116.16(10) |
| C8   | C9   | C4   | 121.68(11) | C24  | C25  | C20  | 121.65(11) |
| C2   | C10  | C11  | 110.05(10) | C18  | C26  | C27  | 110.13(10) |
| N2   | C11  | C10  | 125.52(11) | N5   | C27  | C26  | 126.36(11) |
| N2   | C11  | C12  | 116.74(11) | N5   | C27  | C28  | 116.23(10) |
| C12  | C11  | C10  | 117.65(10) | C28  | C27  | C26  | 117.41(10) |
| N3   | C12  | C11  | 114.85(10) | N6   | C28  | C27  | 115.21(10) |
| N3   | C12  | C13  | 122.55(11) | N6   | C28  | C29  | 122.63(11) |
| C13  | C12  | C11  | 122.50(11) | C29  | C28  | C27  | 122.15(11) |
| C14  | C13  | C12  | 118.49(12) | C30  | C29  | C28  | 118.93(12) |
| C13  | C14  | C15  | 119.35(12) | C31  | C30  | C29  | 118.82(12) |
| C16  | C15  | C14  | 118.24(12) | C32  | C31  | C30  | 118.17(12) |
| N3   | C16  | C15  | 123.55(12) | N6   | C32  | C31  | 124.24(13) |

**Table S4.** Torsion angles for **4f**.

| A  | B   | C   | D   | Angle (°)   | A   | B   | C   | D   | Angle (°)   |
|----|-----|-----|-----|-------------|-----|-----|-----|-----|-------------|
| O1 | C1  | C2  | C3  | 178.74(12)  | O3  | C17 | C18 | C19 | 178.90(12)  |
| O1 | C1  | C2  | C10 | -0.77(19)   | O3  | C17 | C18 | C26 | 1.10(19)    |
| O2 | C1  | C2  | C3  | -0.09(17)   | O4  | C17 | C18 | C19 | -0.21(18)   |
| O2 | C1  | C2  | C10 | -179.60(10) | O4  | C17 | C18 | C26 | -178.01(10) |
| N1 | N2  | C11 | C10 | 1.50(18)    | N4  | N5  | C27 | C26 | 0.45(18)    |
| N1 | N2  | C11 | C12 | -174.89(10) | N4  | N5  | C27 | C28 | -179.17(10) |
| N1 | C3  | C4  | C5  | -1.41(18)   | N4  | C19 | C20 | C21 | -2.38(18)   |
| N1 | C3  | C4  | C9  | 179.54(11)  | N4  | C19 | C20 | C25 | 179.57(11)  |
| N2 | N1  | C3  | C2  | -15.09(17)  | N5  | N4  | C19 | C18 | -0.86(18)   |
| N2 | N1  | C3  | C4  | 164.65(11)  | N5  | N4  | C19 | C20 | 178.82(11)  |
| N2 | C11 | C12 | N3  | -177.74(11) | N5  | C27 | C28 | N6  | -171.36(11) |
| N2 | C11 | C12 | C13 | 5.81(17)    | N5  | C27 | C28 | C29 | 9.86(17)    |
| N3 | C12 | C13 | C14 | -3.97(18)   | N6  | C28 | C29 | C30 | -2.49(19)   |
| C1 | O2  | C9  | C4  | 0.08(17)    | C17 | O4  | C25 | C20 | 3.53(17)    |
| C1 | O2  | C9  | C8  | -179.25(11) | C17 | O4  | C25 | C24 | -176.07(11) |
| C1 | C2  | C3  | N1  | -179.69(11) | C17 | C18 | C19 | N4  | -178.56(11) |
| C1 | C2  | C3  | C4  | 0.58(18)    | C17 | C18 | C19 | C20 | 1.77(17)    |
| C1 | C2  | C10 | C11 | -167.24(10) | C17 | C18 | C26 | C27 | 179.79(10)  |
| C2 | C3  | C4  | C5  | 178.33(11)  | C18 | C19 | C20 | C21 | 177.30(11)  |
| C2 | C3  | C4  | C9  | -0.72(17)   | C18 | C19 | C20 | C25 | -0.76(17)   |
| C2 | C10 | C11 | N2  | -14.41(17)  | C18 | C26 | C27 | N5  | -1.87(17)   |
| C2 | C10 | C11 | C12 | 161.95(10)  | C18 | C26 | C27 | C28 | 177.75(10)  |

| A   | B   | C   | D   | Angle (°)   | A   | B   | C   | D   | Angle (°)   |
|-----|-----|-----|-----|-------------|-----|-----|-----|-----|-------------|
| C3  | N1  | N2  | C11 | 14.46(17)   | C19 | N4  | N5  | C27 | 1.07(18)    |
| C3  | C2  | C10 | C11 | 13.25(16)   | C19 | C18 | C26 | C27 | 1.98(15)    |
| C3  | C4  | C5  | C6  | -178.39(12) | C19 | C20 | C21 | C22 | -177.95(11) |
| C3  | C4  | C9  | O2  | 0.40(17)    | C19 | C20 | C25 | O4  | -1.87(17)   |
| C3  | C4  | C9  | C8  | 179.70(11)  | C19 | C20 | C25 | C24 | 177.71(11)  |
| C4  | C5  | C6  | C7  | -1.3(2)     | C20 | C21 | C22 | C23 | 0.64(19)    |
| C5  | C4  | C9  | O2  | -178.71(11) | C21 | C20 | C25 | O4  | 179.94(11)  |
| C5  | C4  | C9  | C8  | 0.58(18)    | C21 | C20 | C25 | C24 | -0.48(18)   |
| C5  | C6  | C7  | C8  | 0.7(2)      | C21 | C22 | C23 | C24 | -1.00(19)   |
| C6  | C7  | C8  | C9  | 0.5(2)      | C22 | C23 | C24 | C25 | 0.61(19)    |
| C7  | C8  | C9  | O2  | 178.16(11)  | C23 | C24 | C25 | O4  | 179.74(11)  |
| C7  | C8  | C9  | C4  | -1.17(19)   | C23 | C24 | C25 | C20 | 0.14(18)    |
| C9  | O2  | C1  | O1  | -179.18(11) | C25 | O4  | C17 | O3  | 178.38(11)  |
| C9  | O2  | C1  | C2  | -0.25(17)   | C25 | O4  | C17 | C18 | -2.43(17)   |
| C9  | C4  | C5  | C6  | 0.65(18)    | C25 | C20 | C21 | C22 | 0.09(18)    |
| C10 | C2  | C3  | N1  | -0.19(17)   | C26 | C18 | C19 | N4  | -0.84(17)   |
| C10 | C2  | C3  | C4  | -179.93(10) | C26 | C18 | C19 | C20 | 179.49(10)  |
| C10 | C11 | C12 | N3  | 5.57(15)    | C26 | C27 | C28 | N6  | 8.98(16)    |
| C10 | C11 | C12 | C13 | -170.88(11) | C26 | C27 | C28 | C29 | -169.79(11) |
| C11 | C12 | C13 | C14 | 172.21(11)  | C27 | C28 | C29 | C30 | 176.19(11)  |
| C12 | N3  | C16 | C15 | 0.58(19)    | C28 | N6  | C32 | C31 | 1.5(2)      |
| C12 | C13 | C14 | C15 | 1.64(18)    | C28 | C29 | C30 | C31 | 1.44(19)    |
| C13 | C14 | C15 | C16 | 1.51(18)    | C29 | C30 | C31 | C32 | 0.9(2)      |
| C14 | C15 | C16 | N3  | -2.75(19)   | C30 | C31 | C32 | N6  | -2.5(2)     |
| C16 | N3  | C12 | C11 | -173.60(11) | C32 | N6  | C28 | C27 | -177.73(11) |
| C16 | N3  | C12 | C13 | 2.84(18)    | C32 | N6  | C28 | C29 | 1.04(19)    |

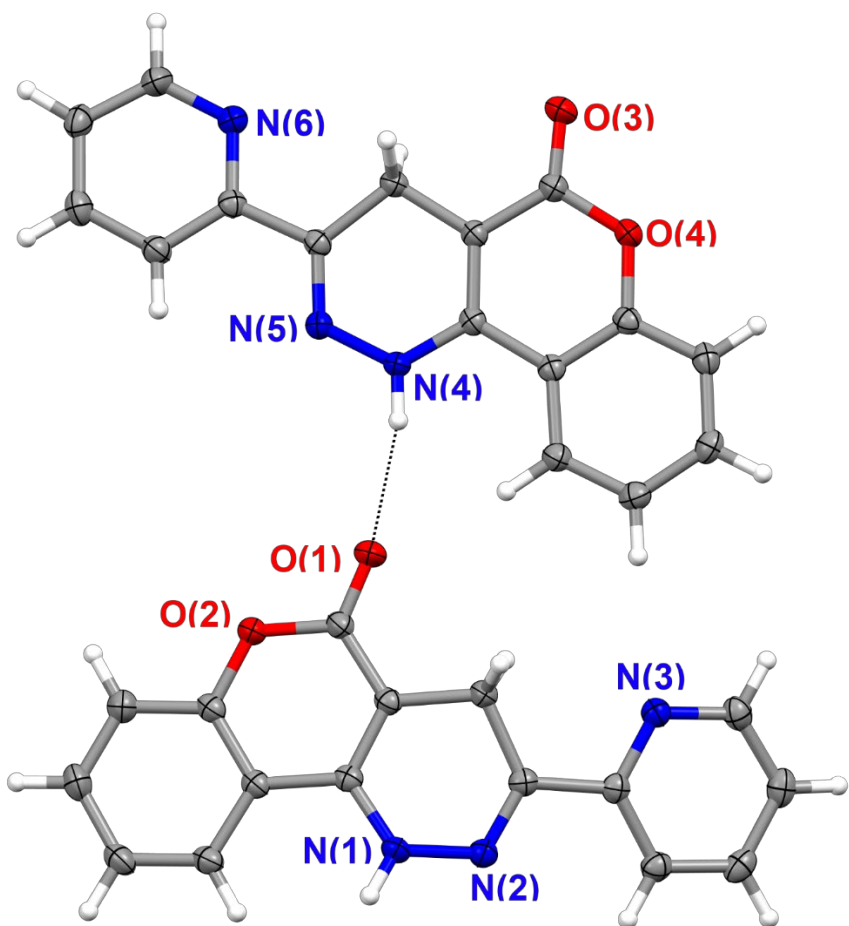

**Figure S1.** Thermal ellipsoid plot (50% probability) of **4f**. N(1)–H···O(4): 2.257(1) Å N(4)–H···O(1): 2.124(1) Å. N(2)–C(11)–C(12)–N(3): 177.8°. N(5)–C(27)–C(28)–N(6): 171.4°.

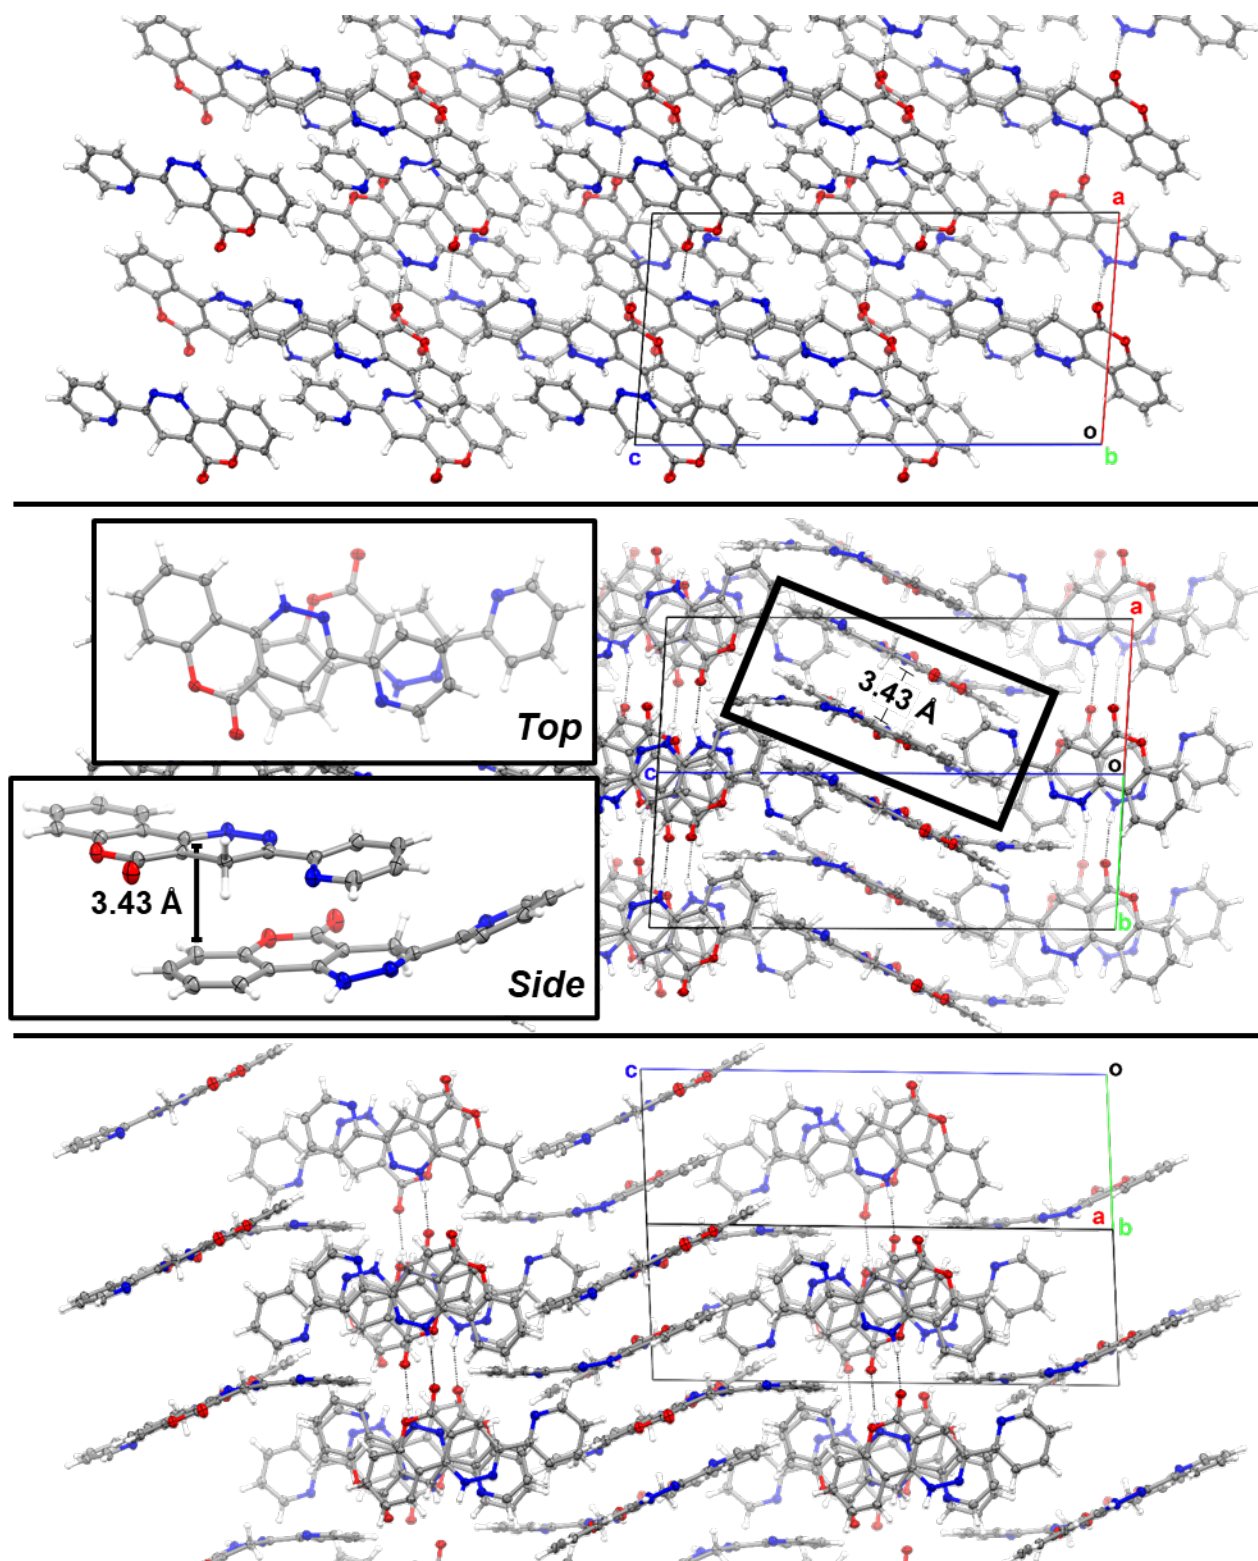

**Figure S2.** Thermal ellipsoid plot (50% probability) of **4f** with a 3 x 3 packing highlighting the orthogonal H-bonding (N(1)–H···O(4) and N(4)–H···O(1)) and pi-stacking layers (~3.43 Å) with varied rotations about the *c* axis (*Top*, *Mid*, *Bottom*).

## References

1. SAINT, version 8.37a; Bruker AXS Inc.: Madison, WI, 2012.
2. Sheldrick, G. SHELXT - Integrated space-group and crystal-structure determination. *Acta Crystallogr., Sect. A: Found. Adv.* **2015**, *71*(1), 3–8.
3. SADABS, version 2014/5; Bruker AXS Inc.: Madison, WI, **2001**.
4. Sheldrick, G. Crystal structure refinement with SHELXL. *Acta Crystallogr., Sect. C: Struct. Chem.* **2015**, *71*(1), 3–8.
